# Supplementary material for: SH-SDS: a new static-dynamic strategy for substation host security detection
Source: PeerJ Comput Sci. 2024 Nov 22;10:e2512. doi: 10.7717/peerj-cs.2512 (PMC11623280; doi:10.7717/peerj-cs.2512)
Supplement: Supplemental Information 1 [file peerj-cs-10-2512-s001.xlsx]

## Sheet: Sheet1
Number of Items	Response Time (s)
16	0.145
15	0.134
14	0.137
13	0.128
12	0.132
11	0.16
10	0.149
9	0.134
8	0.132
14	0.12
13	0.133
16	0.141
15	0.137
13	0.142
11	0.139
12	0.146
16	0.137
14	0.144
13	0.148
12	0.136
11	0.135
16	0.141
13	0.138
10	0.143
9	0.136
10	0.129
12	0.137
13	0.135
14	0.138
14	0.136
